# Supplementary material for: Synthesis of dipyrrolopyrazine-based sensitizers with a new π-bridge end-capped donor–acceptor framework for DSSCs: a combined experimental and theoretical investigation
Source: Royal Society of Chemistry journal article supplement (doi:10.1039/c8nj06083e), 2019-01-01
Supplement: c8nj06083e1.pdf [file c8nj06083e1.pdf]

## Supporting information

### Synthesis of Dipyrrolopyrazine based sensitizer as new $\pi$ -bridge end-capped with Donor-Acceptor for DSSC: A combined experimental and theoretical investigation

Puttavva Meti <sup>a</sup>, Goli Nagaraju <sup>b</sup>, Jung-Won Yang <sup>a</sup>, Sun Hwa Jung <sup>a</sup>, and Young-Dae Gong <sup>a\*</sup>

<sup>a</sup> Innovative Drug Library Research Center, Department of Chemistry, College of Science, Dongguk University,

26, 3-ga, Pil-dong, Jung-gu, Seoul 04620, Republic of Korea

<sup>b</sup> Department of Chemical engineering, College of Engineering, Kyung Hee University, 1 Seocheon-dong,

Giheung-gu, Yongin-si, Gyeonggi-do 446-70, Republic of Korea

---

## Contents

|                                                                                    |       |
|------------------------------------------------------------------------------------|-------|
| 1. <sup>1</sup> H NMR and <sup>13</sup> C NMR of intermediates <b>2(a-c)</b> ..... | S2-S3 |
| 2. <sup>1</sup> H NMR and <sup>13</sup> C NMR of chromophores <b>3(a-c)</b> .....  | S4-S6 |
| 3. HRMS spectra of intermediates <b>2(a-c)</b> .....                               | S7    |
| 4. HRMS spectra of final compounds <b>3(a-c)</b> .....                             | S8    |
| 5. Cyclic Voltammograms of dyes <b>3(b-d)</b> .....                                | S9    |

# <sup>1</sup>H NMR <sup>13</sup>C NMR spectra of compounds

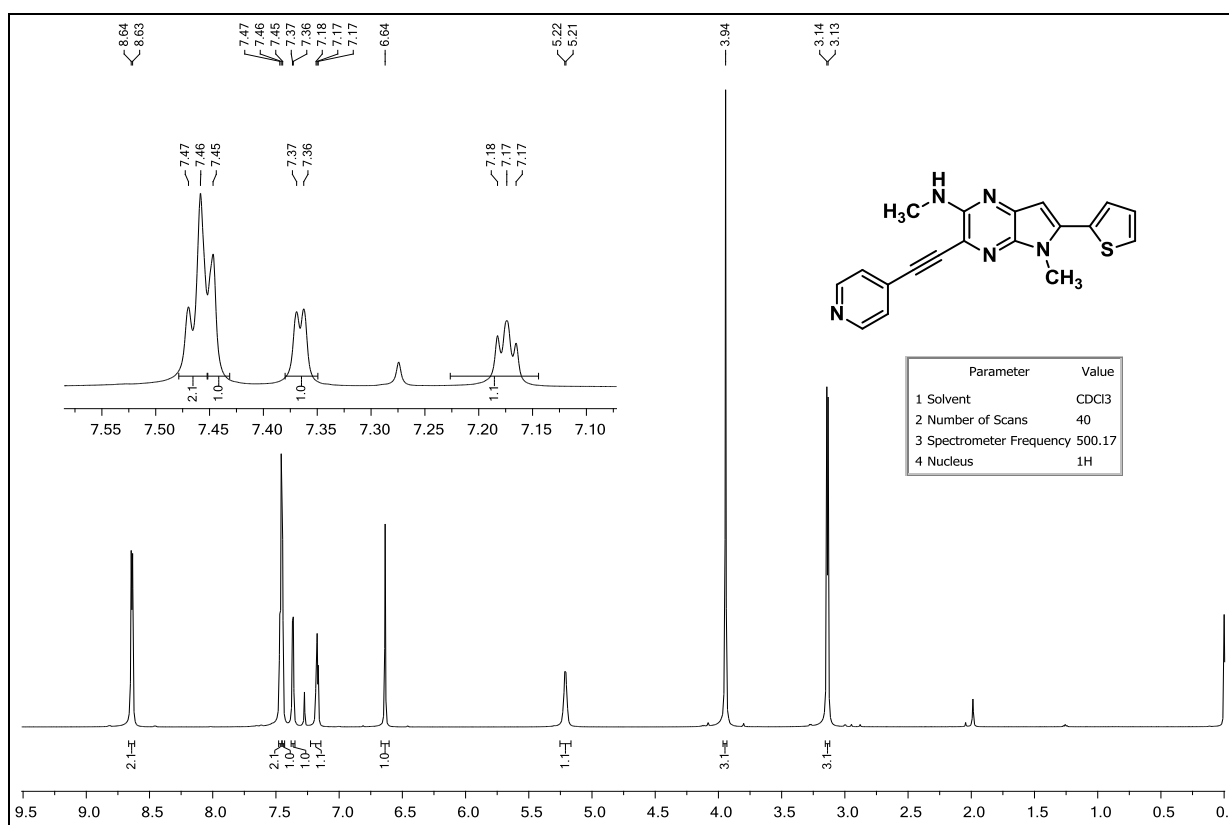

## <sup>1</sup>H NMR – 2b

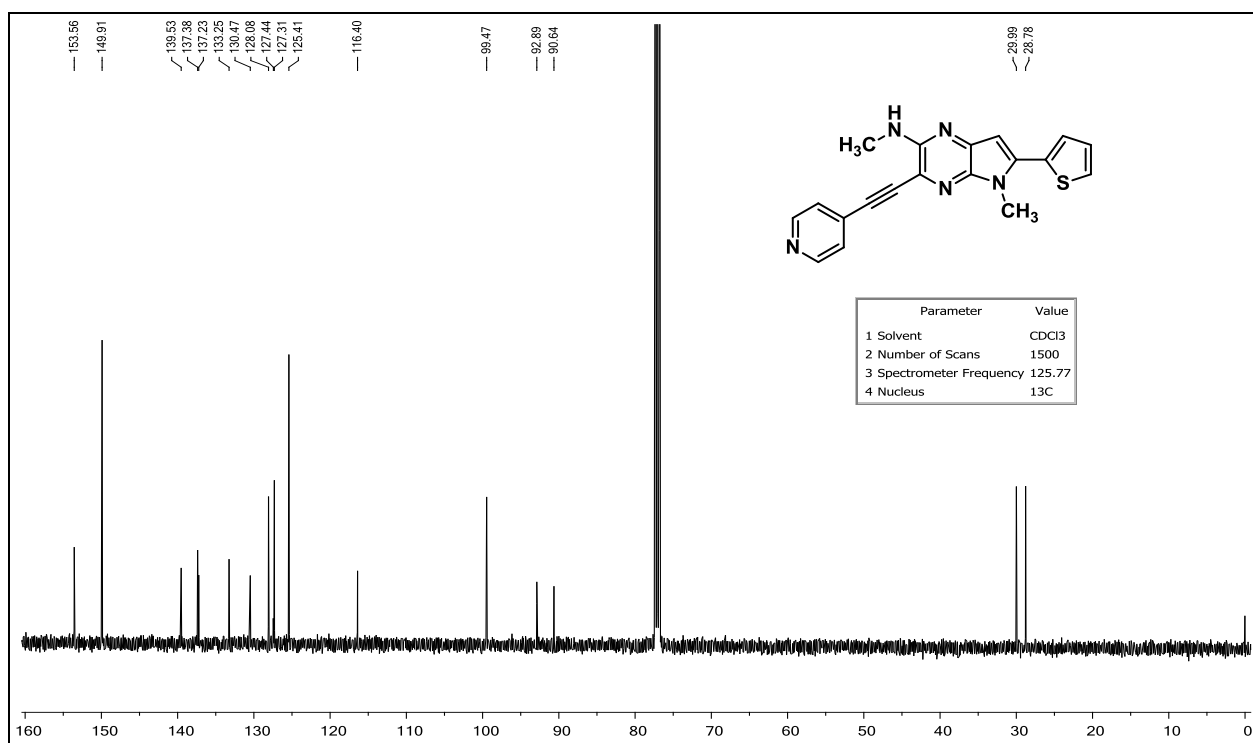

## <sup>13</sup>C NMR – 2b

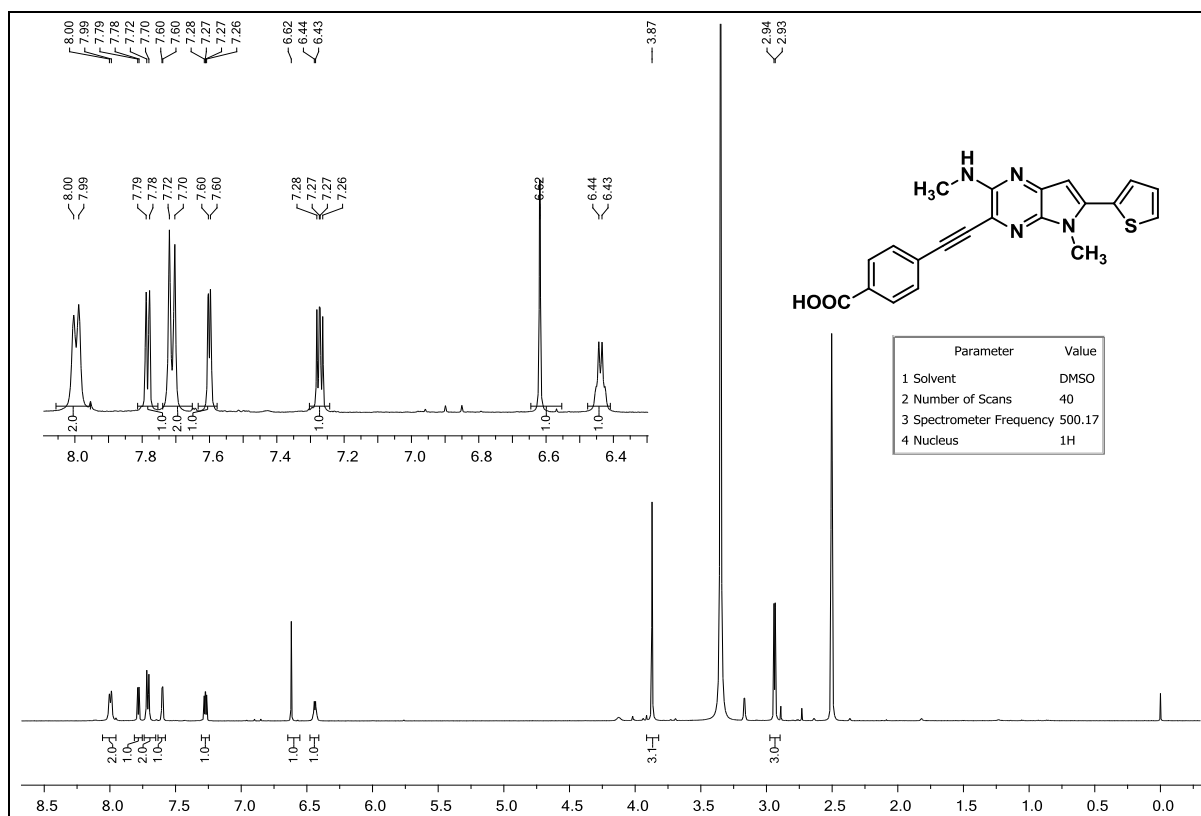

<sup>1</sup>H NMR – 2c

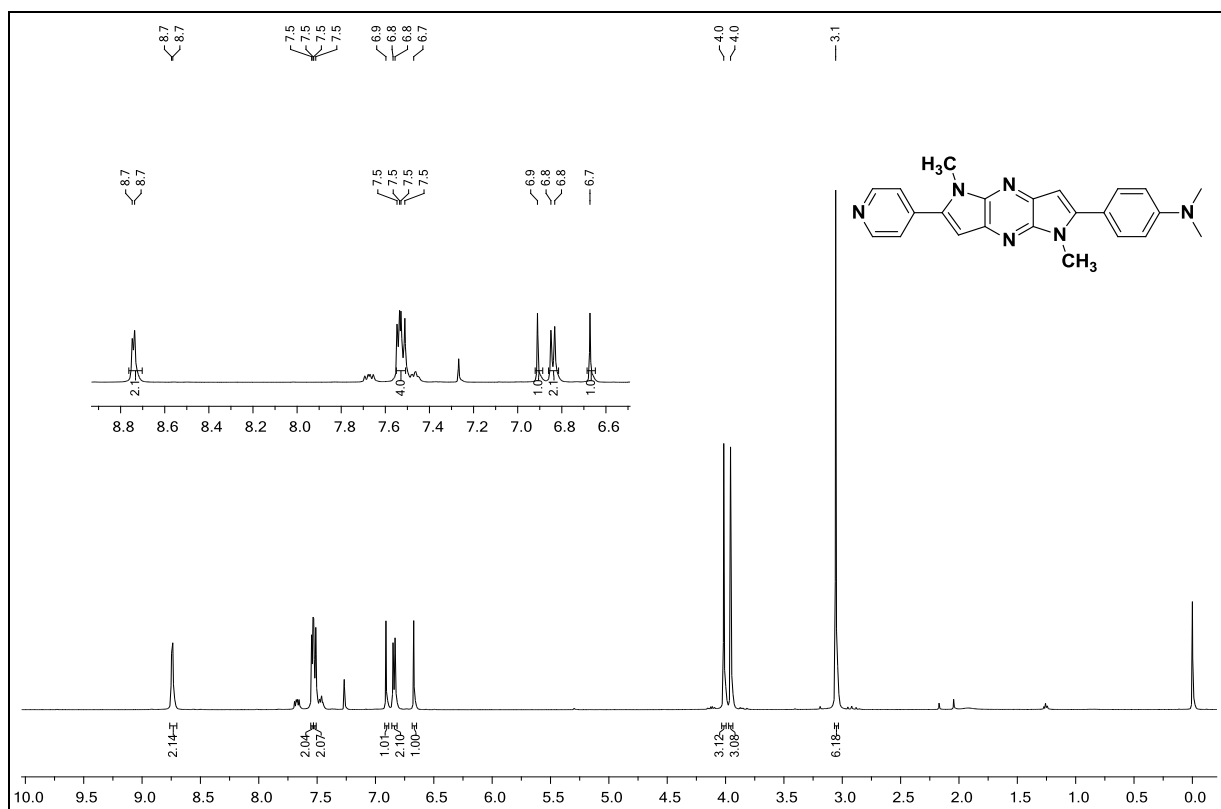

**<sup>1</sup>H NMR – 3a**

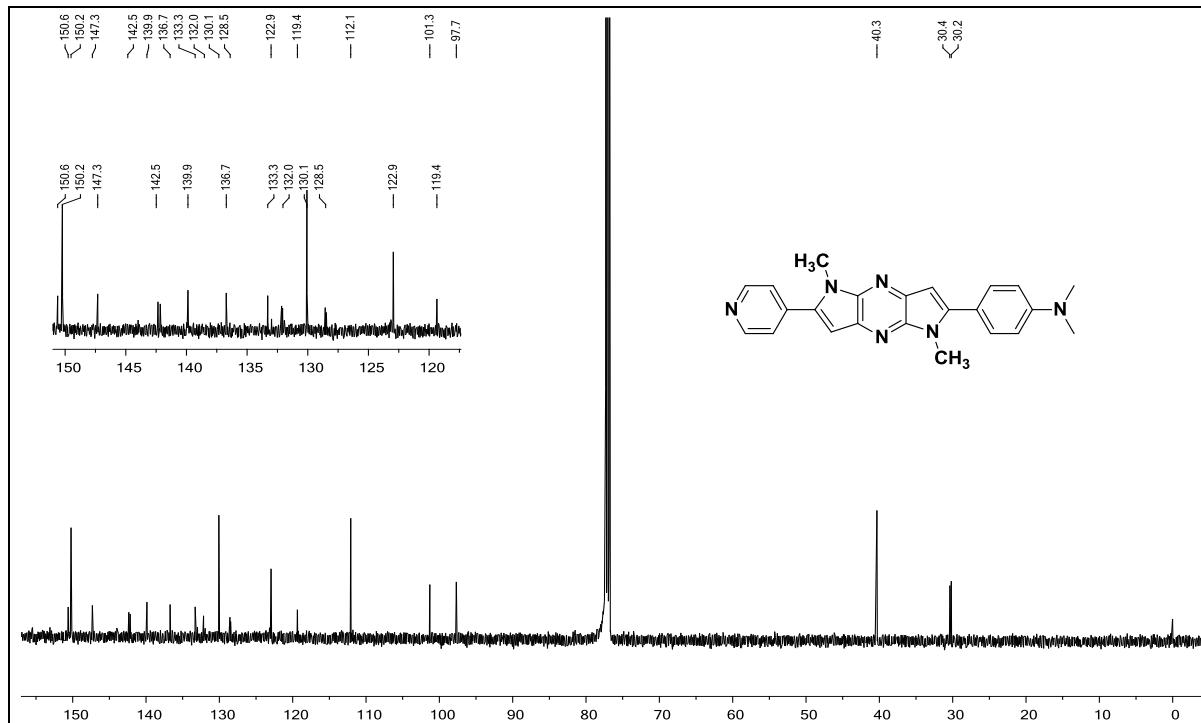

**<sup>13</sup>C NMR – 3a**

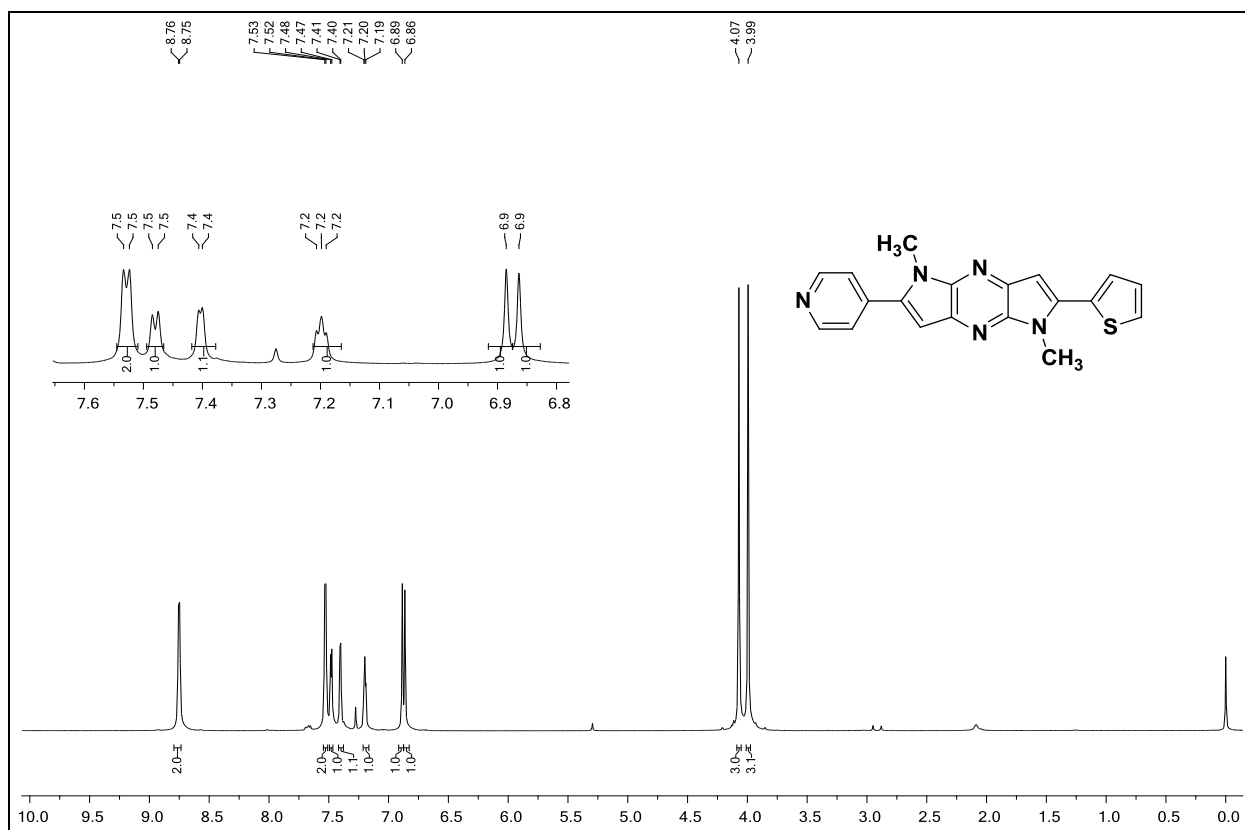

**<sup>1</sup>H NMR – 3b**

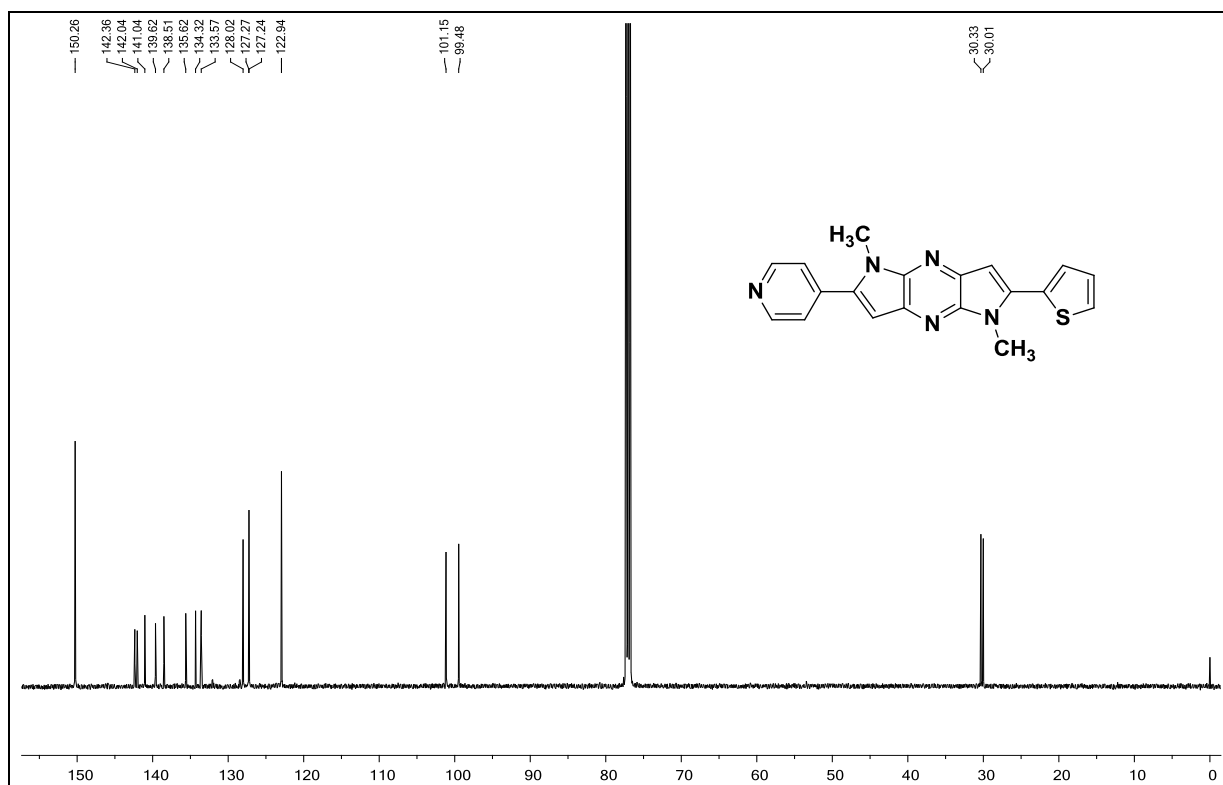

**<sup>13</sup>C NMR – 3b**

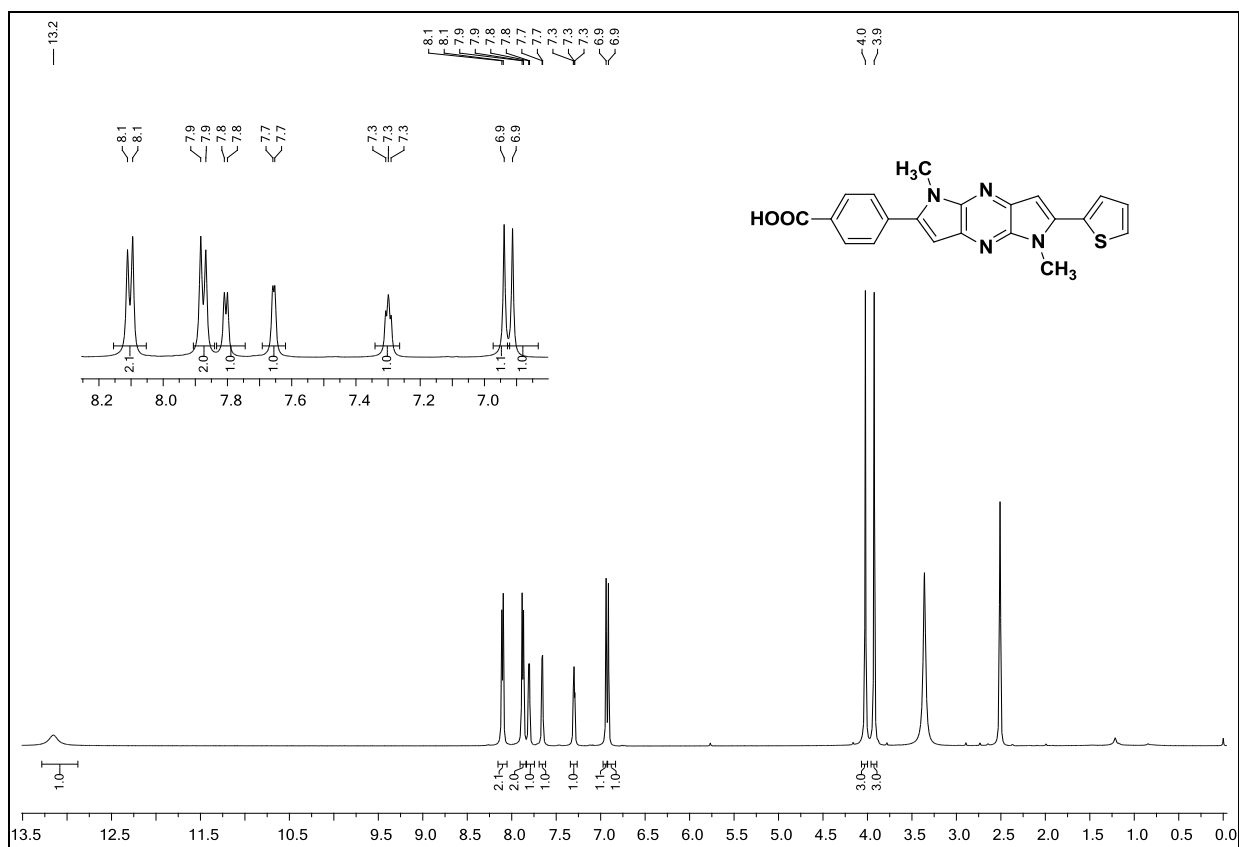

**<sup>1</sup>H NMR – 3c**

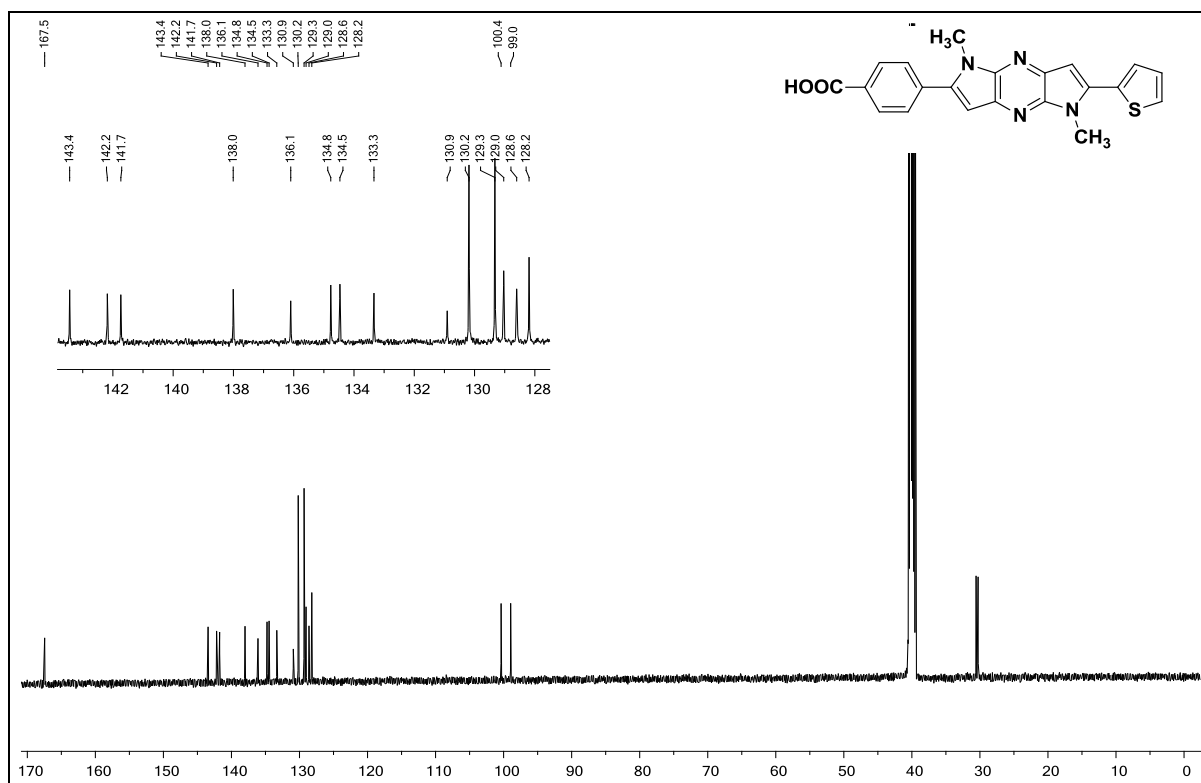

**<sup>13</sup>C NMR – 3c**

## HRMS spectra of intermediates and final compounds

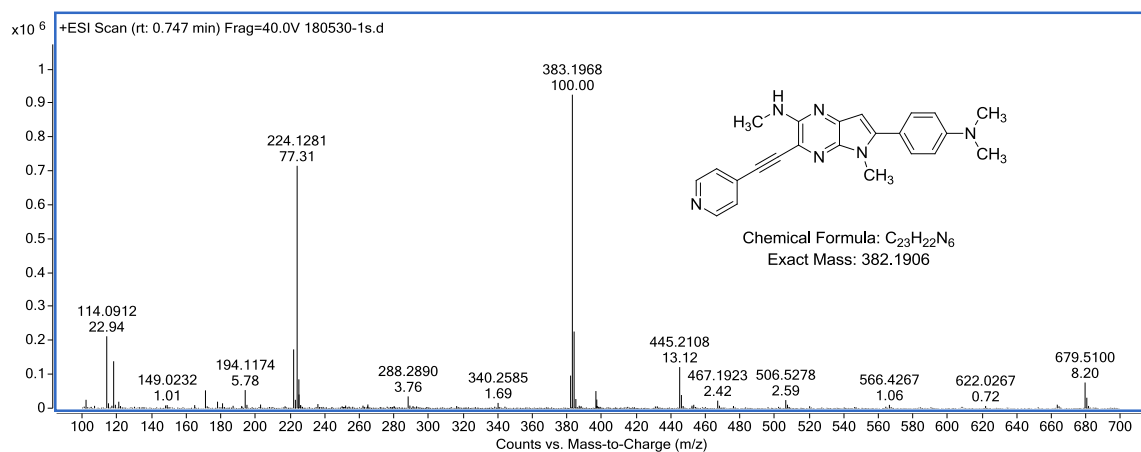

**HRMS – 2a**

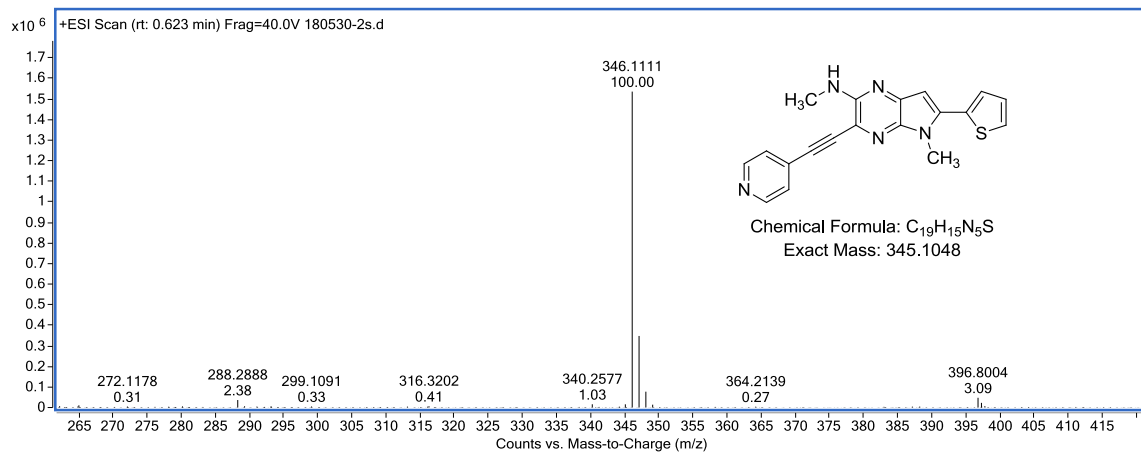

**HRMS – 2b**

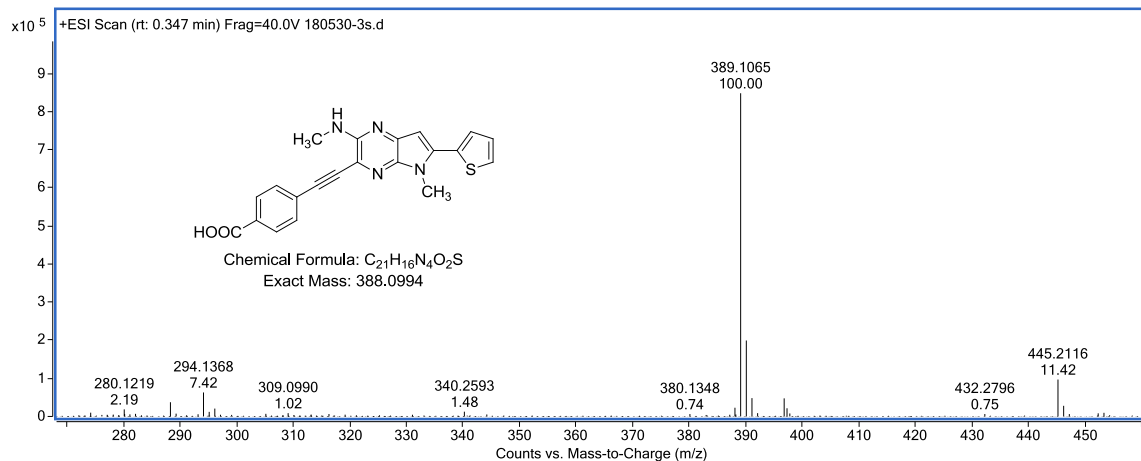

**HRMS – 2c**

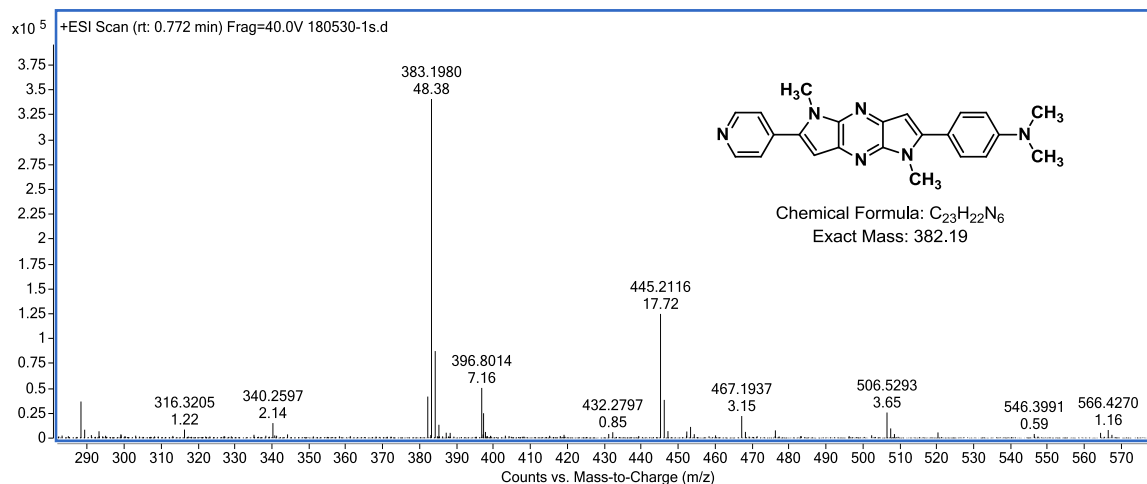

**HRMS – 3a**

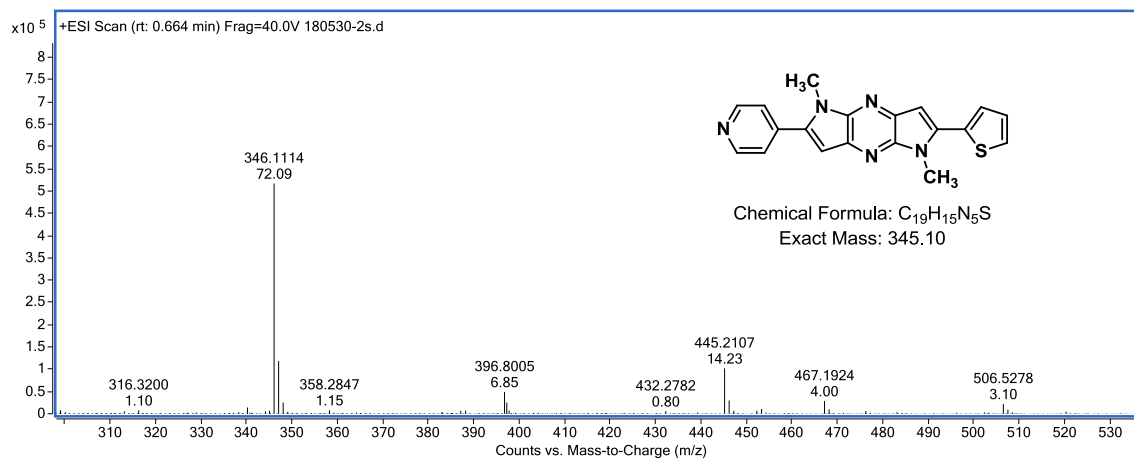

**HRMS – 3b**

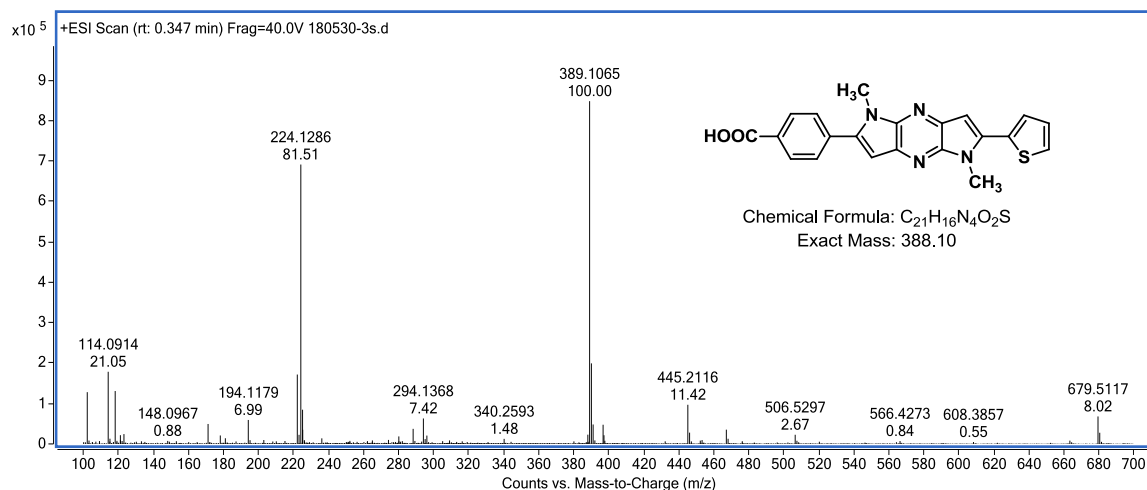

**HRMS – 3c**



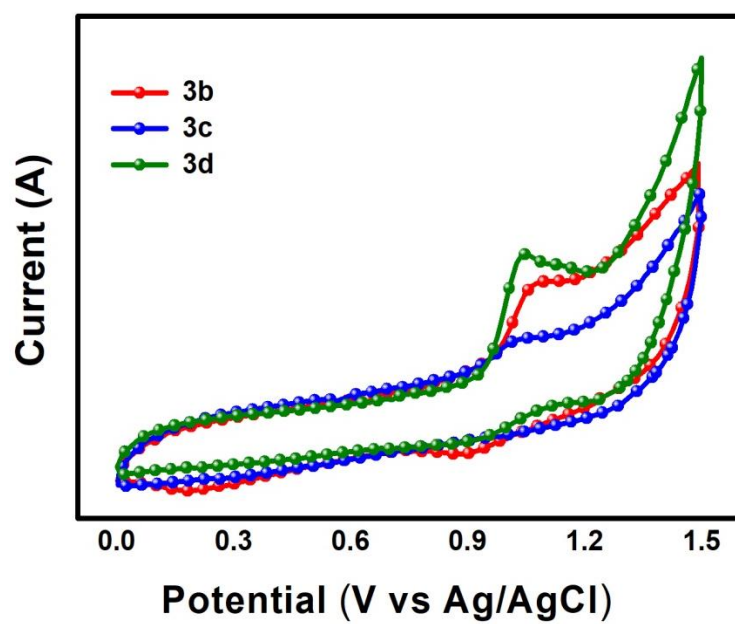

**Fig 1.** Cyclic Voltammograms of **3(b-d)** in  $\text{CH}_2\text{Cl}_2$  solution with 0.1M  $\text{nBu}_4\text{NPF}_6$  used as supporting electrolyte, scan rate 50 m V/s.
